# Supplementary material for: Potency- and Selectivity-Enhancing Mutations of Conotoxins for Nicotinic Acetylcholine Receptors Can Be Predicted Using Accurate Free-Energy Calculations
Source: MDPI journal article supplement (doi:10.3390/md19070367), 2021-06-25
Supplement: s1 [file s1]

---

*Article*

# Potency- and Selectivity-Enhancing Mutations of Conotoxins for Nicotinic Acetylcholine Receptors can be Predicted Using Accurate Free-Energy Calculations

Dana Katz<sup>1</sup>, Michael A. DiMattia<sup>1</sup>, Dan Sindhikara<sup>1,†</sup>, Hubert Li<sup>1</sup>, Nikita Abraham<sup>2</sup>, and Abba E. Leffler<sup>1\*</sup>

<sup>1</sup> Schrödinger, Inc., 120 West 45th St., New York, NY 10036, United States

<sup>2</sup> D.E. Shaw India Private Ltd., Hyderabad, Telangana 500096, India

\* Correspondence: [abba.leffler@schrodinger.com](mailto:abba.leffler@schrodinger.com)

† Current address: Merck and Co., Inc., Kenilworth, NJ 07033, United States

## Table of Contents

**Table S1.** Comparison of FEP affinity predictions for LsIA mutations using OPLS3e and OPLS4 forcefields

**Figure S1.** MM-GB/SA selectivity predictions for LvIA mutants using different nAChR conformations

**Figure S2.** Performance of MM-GB/SA using an ensemble of conformations

---

**Table S1.** Comparison of FEP affinity predictions for LsIA mutations using OPLS3e and OPLS4 forcefields

| LsIA Mutation | Experimental $\Delta\Delta G$ at<br>Ls-AchBP (kcal/mol) | OPLS3e Predicted<br>$\Delta\Delta G$ (kcal/mol) | OPLS4 Predicted<br>$\Delta\Delta G$ (kcal/mol) |
|---------------|---------------------------------------------------------|-------------------------------------------------|------------------------------------------------|
| R10M          | 0.51                                                    | $-0.70 \pm 0.22$                                | $-2.72 \pm 0.18$                               |
| R10F          | -0.38                                                   | $-0.82 \pm 0.07$                                | $-2.81 \pm 0.34$                               |
| N12Q          | 1.45                                                    | $1.57 \pm 0.30$                                 | $1.25 \pm 0.11$                                |

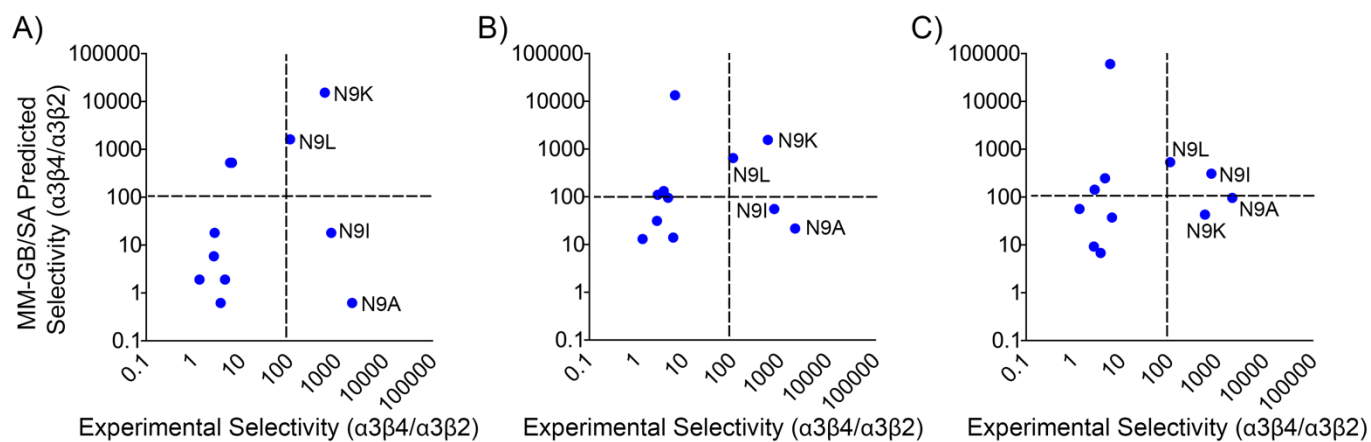

**Figure S1.** MM-GB/SA selectivity predictions for LvIA mutants using different nAChR conformations. The accuracy of MM/GB-SA at classifying LvIA mutants as selective or not was measured using  $\alpha 3\beta 2$  and  $\alpha 3\beta 4$  nAChR conformations (A) prior to MD refinement (B) extracted from the respective simulation frames after 5 ns of MD refinement (C) extracted from the final frames of the respective WT LvIA FEP trajectories. The four mutants which are experimentally verified to be greater than 100X selective are labeled.

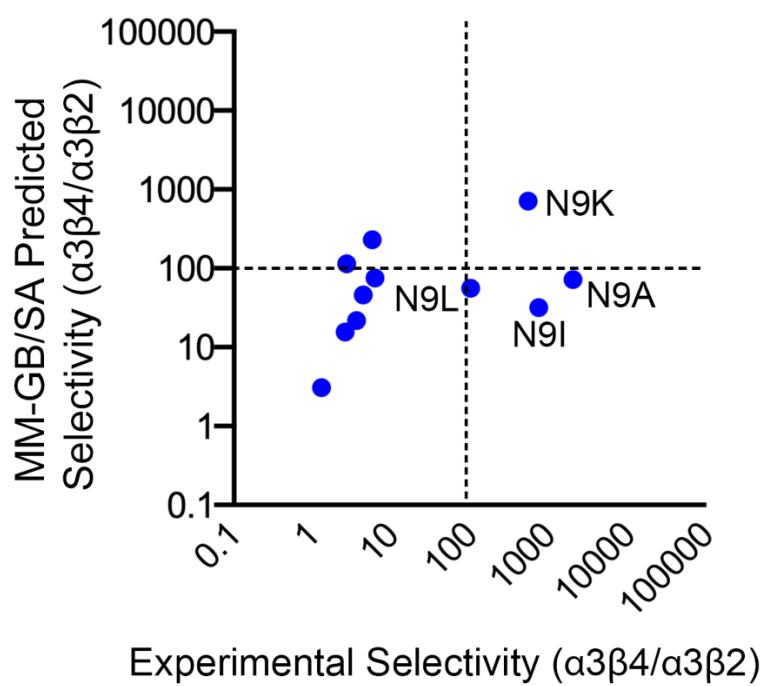

**Figure S2.** Performance of MM/GB-SA using an ensemble of conformations. The selectivities of eleven LvIA mutants were computed with MM/GB-SA using ten, evenly spaced frames from a 25 ns MD trajectory. The four mutants which are experimentally verified to be greater than 100X selective are labeled.
